# Supplementary material
Source: Springer Nature journal article supplement (https://www.springermedizin.de/resource/supplementary/13063_2013_2055_MOESM2_ESM.pdf/9621286)

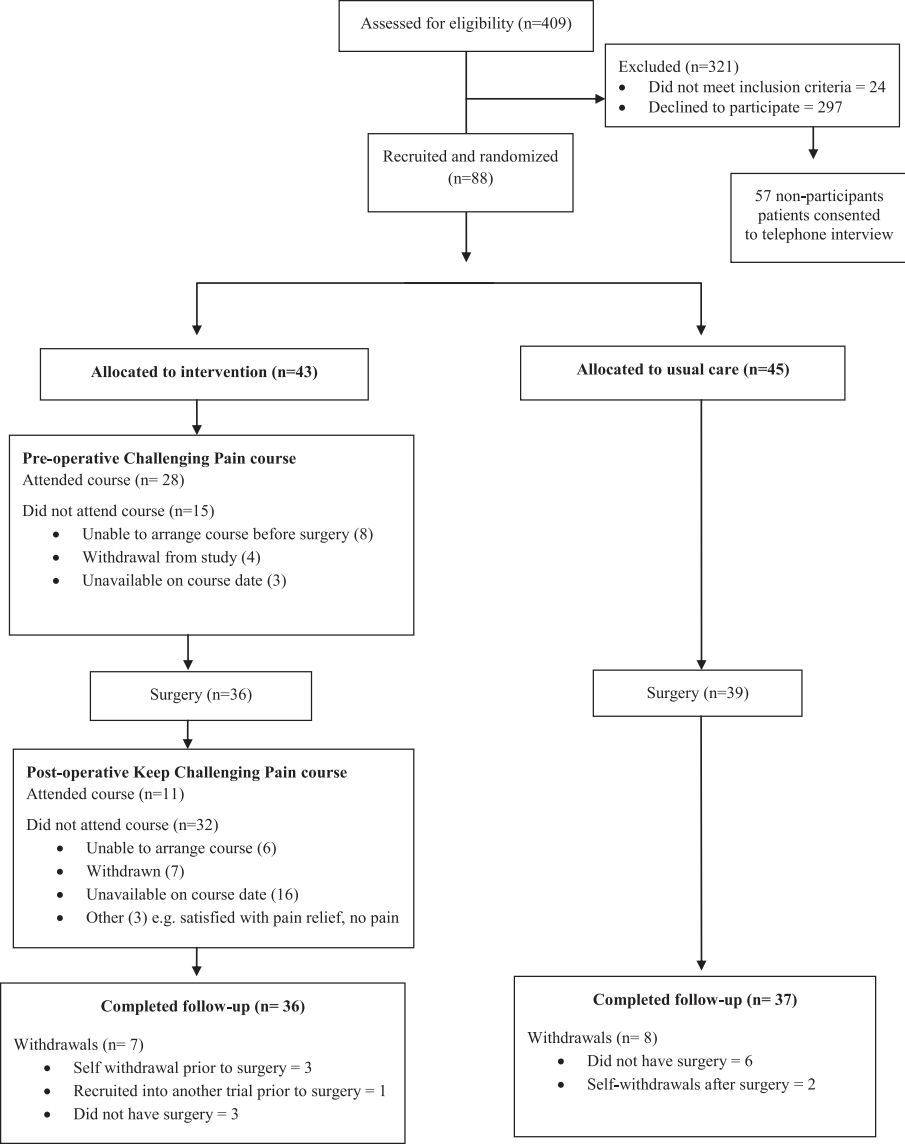

Supplement: MOESM2 [file 9621286]
